# Supplementary material for: Synthesis, Conformational Analysis and ctDNA Binding Studies of Flavonoid Analogues Possessing the 3,5-di-tert-butyl-4-hydroxyphenyl Moiety
Source: MDPI journal article supplement (doi:10.3390/antiox11112273), 2022-11-17

# **<sup>1</sup>H NMR of compound 3**

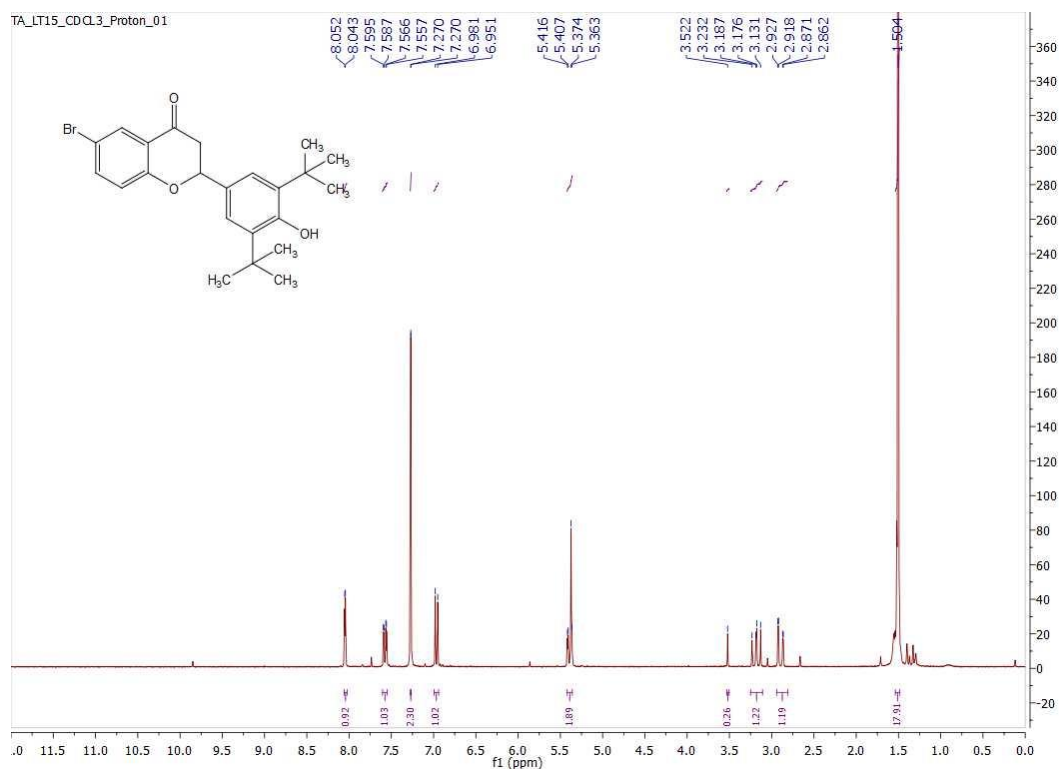

# **<sup>13</sup>C NMR of compound 3**

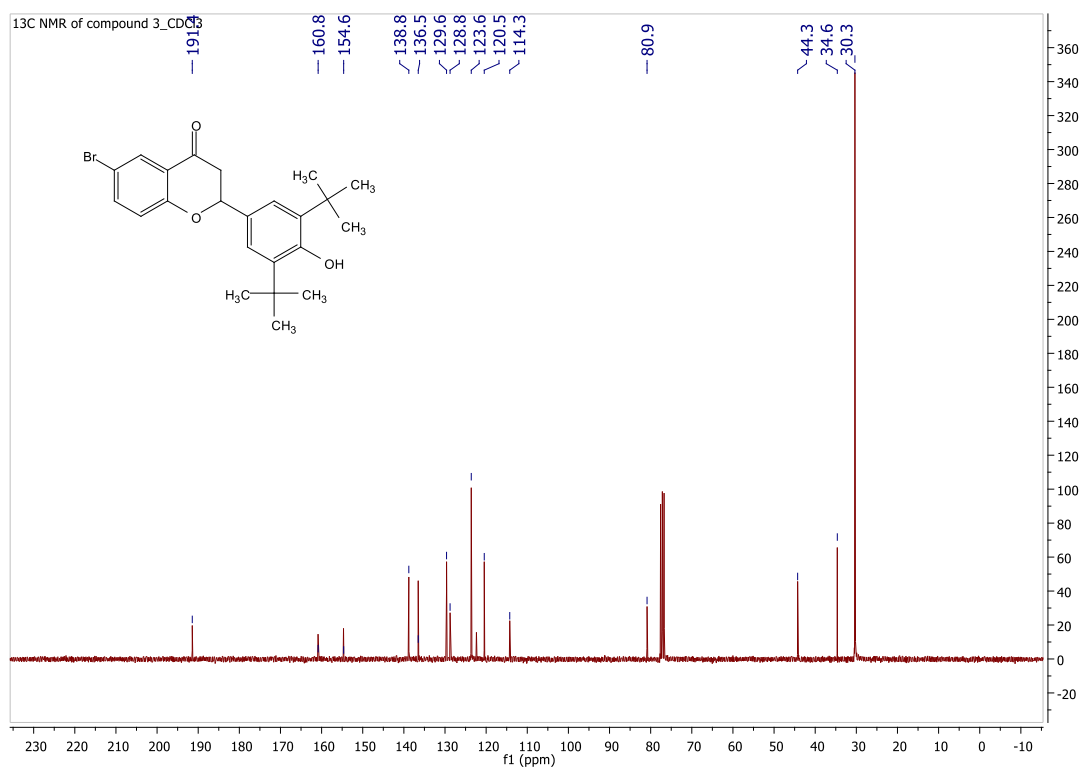



## <sup>1</sup>H NMR of compound 4

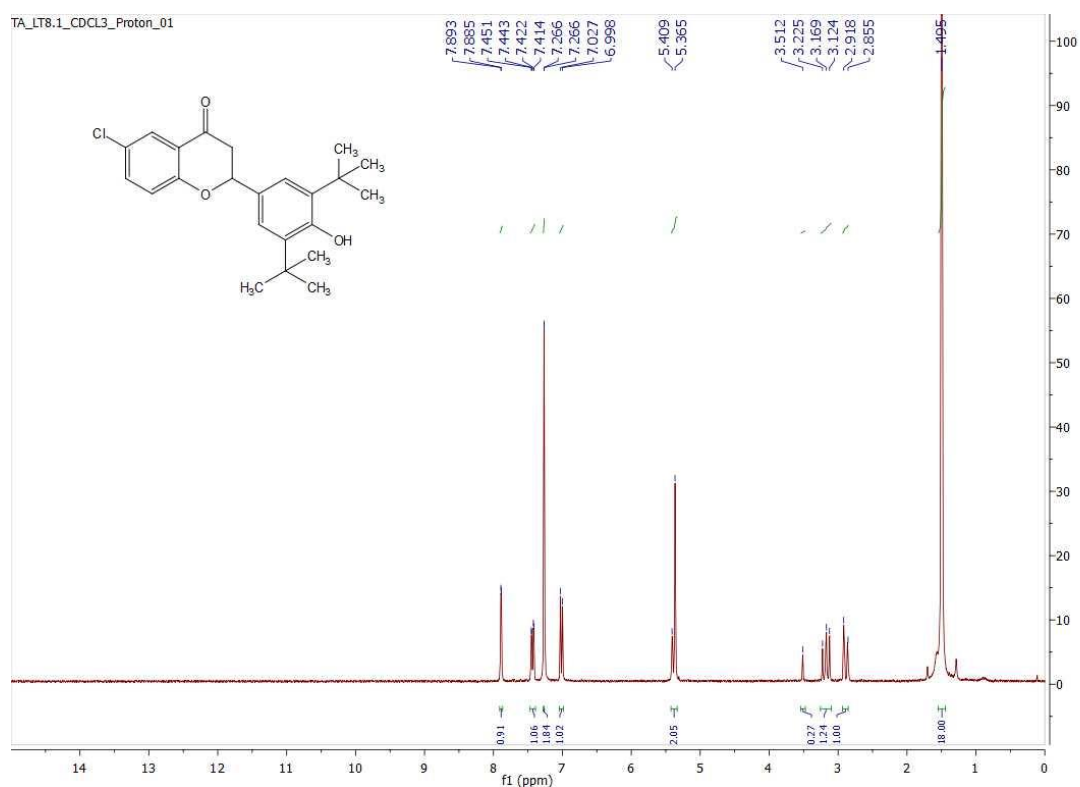

## <sup>13</sup>C NMR of compound 4

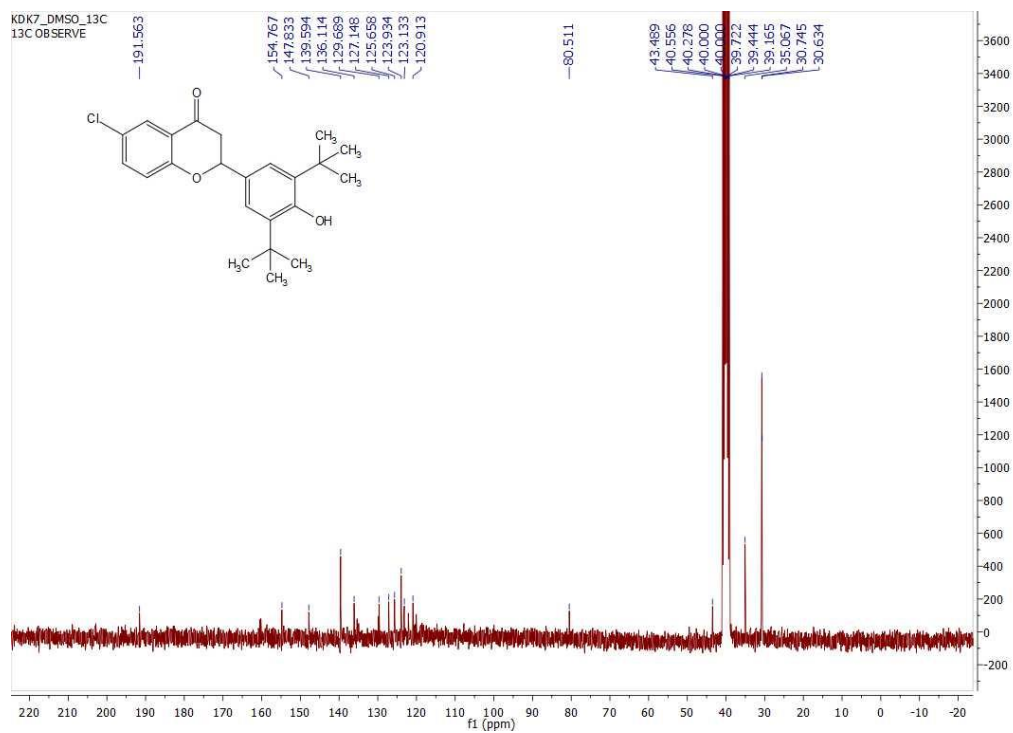



## <sup>1</sup>H NMR of compound 5

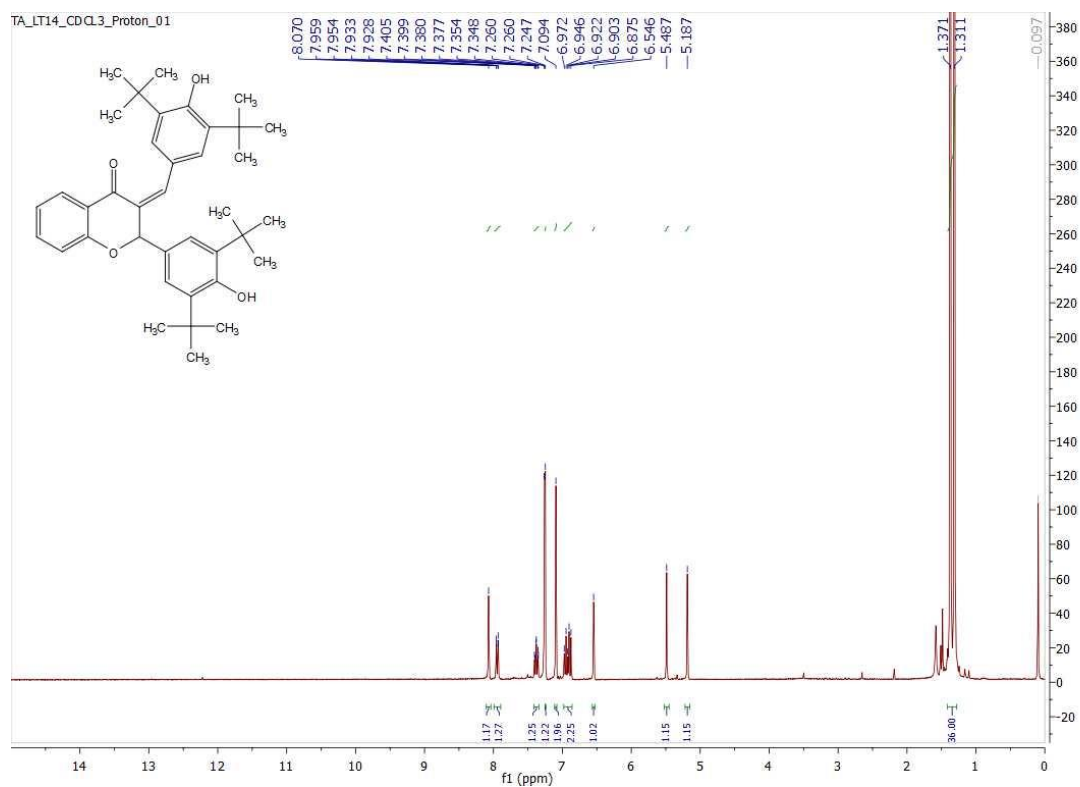

## <sup>13</sup>C NMR of compound 5

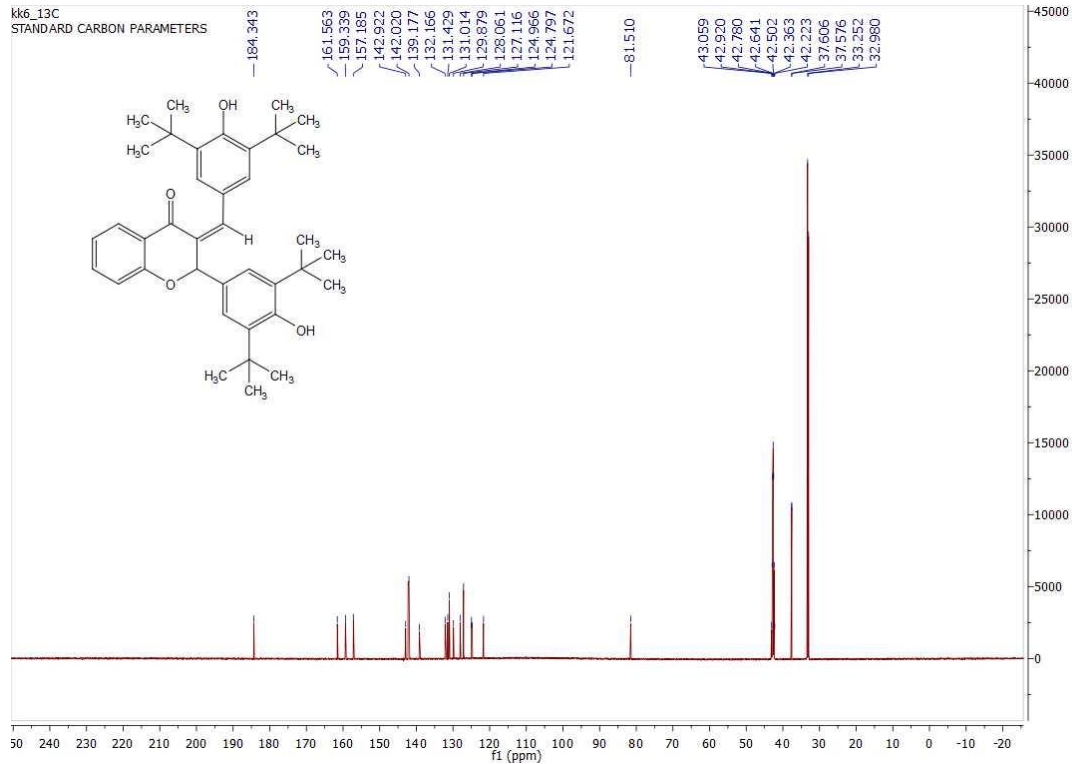



## <sup>1</sup>H NMR of compound 6

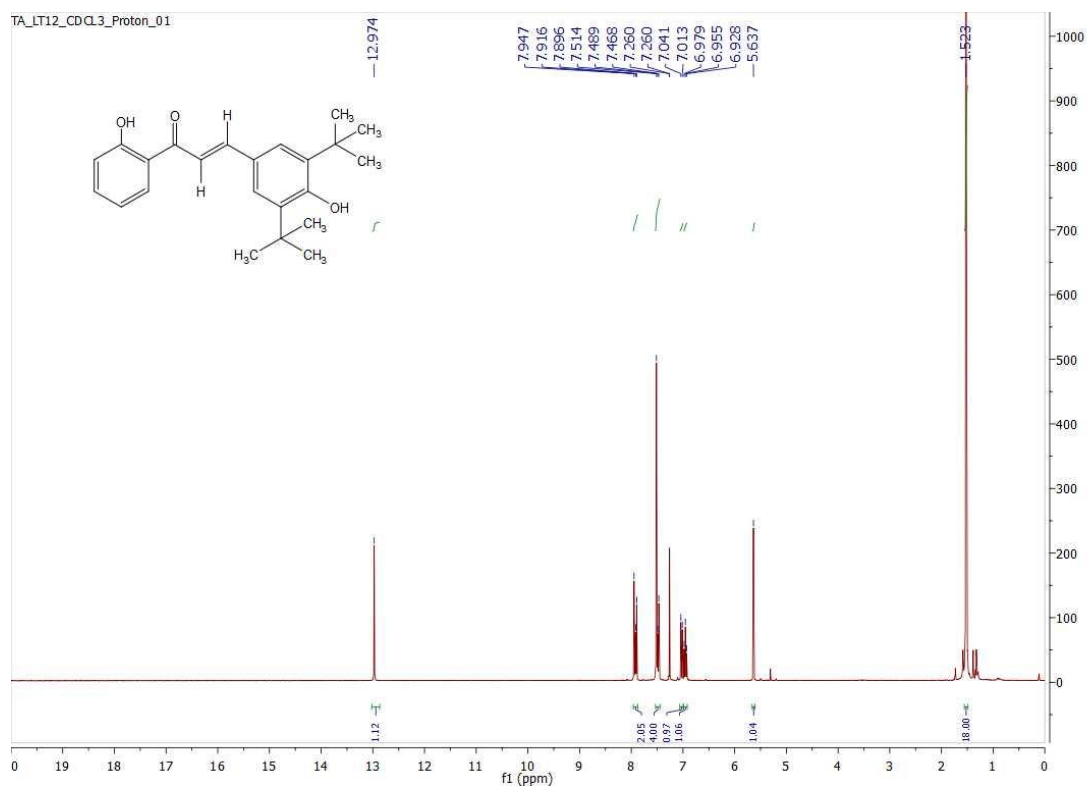

## <sup>13</sup>C NMR of compound 6

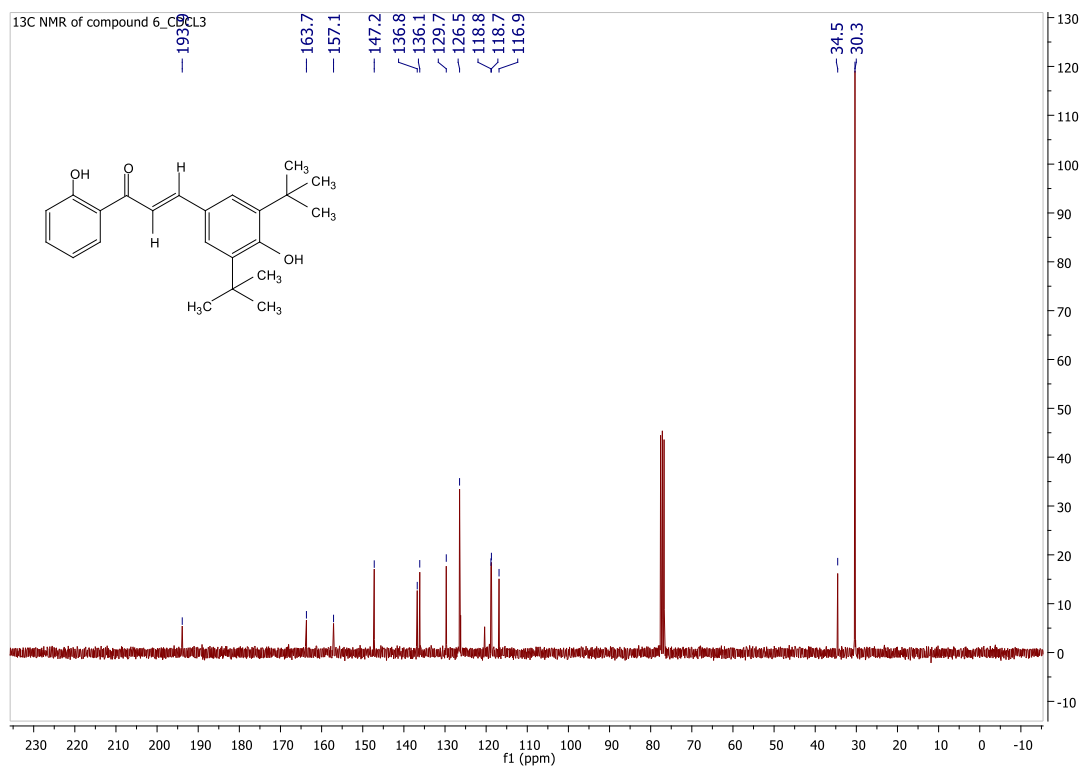



## MS of compound 3

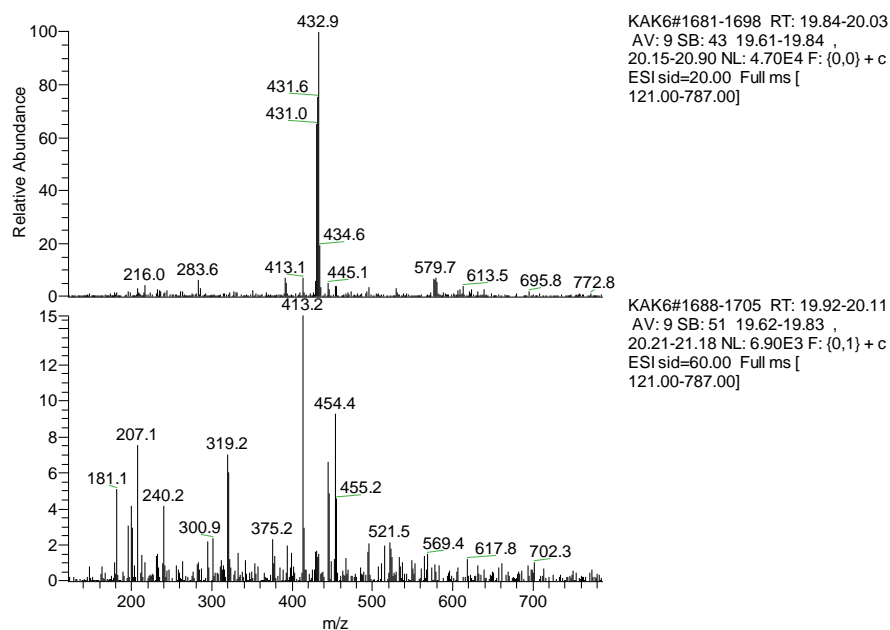

## MS of compound 4

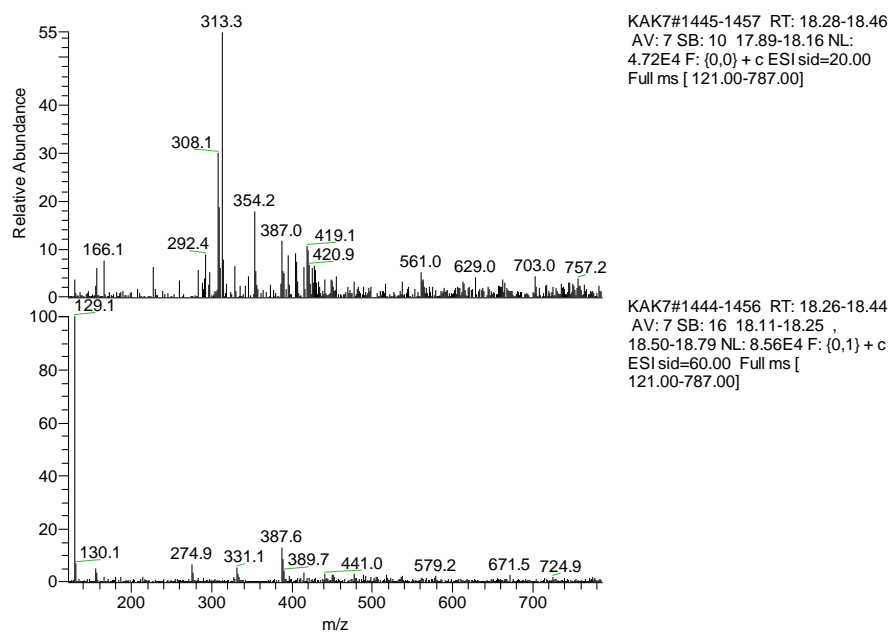



## MS of compound 5

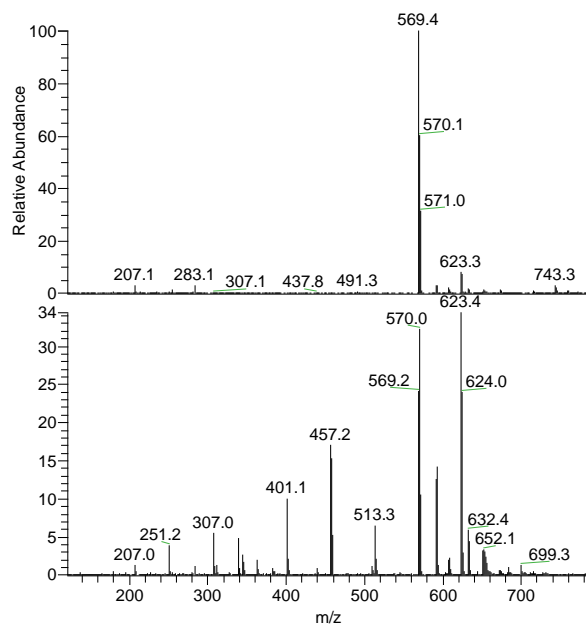

KK6\_2#1749-1778 RT: 19.56-19.87  
 AV: 15 SB: 143 18.20-19.35 ,  
 20.50-22.44 NL: 3.13E5 F: {0,0} + c  
 ESI: sid=20.00 Full ms [  
 121.00-787.00]

KK6\_2#1754-1782 RT: 19.62-19.93  
 AV: 15 SB: 217 17.73-19.09 ,  
 20.55-23.84 NL: 1.08E5 F: {0,1} + c  
 ESI: sid=60.00 Full ms [  
 121.00-787.00]

## MS of compound 6

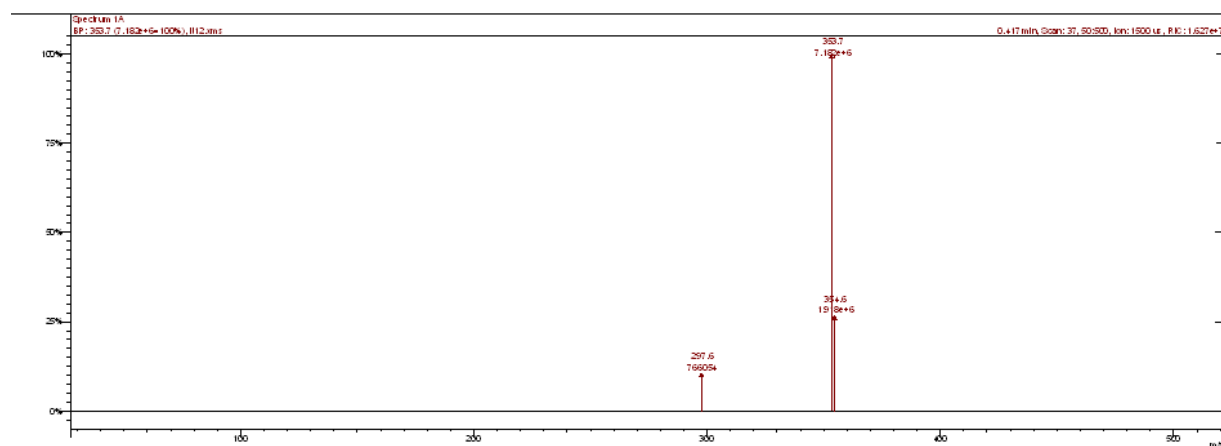

Supplement: s1 [file s1]
